# Supplementary material
Source: PubMed Central journal article supplement (PMC7441467)
Supplement: jamaophthalmol-e202990-s001.pdf [file jamaophthalmol-e202990-s001.pdf]

## Supplementary Online Content

Runhart EH, Khan M, Cornelis SS, et al; *ABCA4* Disease Consortium Study Group. Association of sex with frequent and mild *ABCA4* alleles in Stargardt disease. *JAMA Ophthalmology*. Published online August 20, 2020. doi: 10.1001/jamaophthalmol.2020.2990

**eTable 1.** The Allele Frequencies of Mild and Severe *ABCA4* Variants in the General Non-Finnish European Population

**eTable 2.** Origin of Participants

**eFigure 1.** Age Distribution by Sex

**eFigure 2.** Age of Onset Distribution by Sex

**eFigure 3.** Sex-Specific Penetrance Estimates for *ABCA4* Alleles c.5603A>T and c.5882G>A

**eReferences**

This supplementary material has been provided by the authors to give readers additional information about their work.

**eTable 1.** The Allele Frequencies of Mild and Severe *ABCA4* Variants in the General Non-Finnish European Population

| Genomic position                          | rs ID        | cDNA notation                  | Protein notation        | AC gnomAD nFE | AF gnomAD nFE |
|-------------------------------------------|--------------|--------------------------------|-------------------------|---------------|---------------|
| <b>Selected mild variants<sup>1</sup></b> |              |                                |                         |               |               |
| 94473807                                  | rs1800553    | c.5882G>A                      | p.(Gly1961Glu)          | 488           | 0.0037783     |
| 94476351                                  | rs61751407   | c.5714+5G>A                    | p.[=,Ile1377Hisfs*3]    | 71            | 0.0005501     |
| 94471055                                  | rs61750641   | c.6089G>A                      | p.(Arg2030Gln)          | 80            | 0.0006196     |
| 94508969                                  | rs61751374   | c.3113C>T                      | p.(Ala1038Val)          | 297           | 0.0023018     |
| 94517254                                  | rs76157638   | c.2588G>C                      | p.[Gly863Ala,Gly863del] | 1012          | 0.0078403     |
| <b>Protein truncating variants</b>        |              |                                |                         |               |               |
| 94586601                                  | rs201738997  | c.1A>G                         | p.(Met1?)               | 0             | 0.0000000     |
| 94586557                                  | rs62645957   | c.45G>A                        | p.(Trp15*)              | 1             | 0.0000088     |
| 94586541                                  | rs770272033  | c.61C>T                        | p.(Gln21*)              | 1             | 0.0000088     |
| 94586536                                  | rs775770837  | c.65delA                       | p.(Lys22Argfs*18)       | 0             | 0.0000000     |
| 94578624                                  | rs398123339  | c.67-2A>G                      | p.?                     | 1             | 0.0000088     |
| 94578623                                  | rs778908435  | c.67-1G>A                      | p.?                     | 0             | 0.0000000     |
| 94578596                                  | rs1191816747 | c.93G>A                        | p.(Trp31*)              | 0             | 0.0000000     |
| 94578567                                  | rs61751410   | c.122G>A                       | p.(Trp41*)              | 1             | 0.0000088     |
| 94578566                                  | rs748357067  | c.123G>A                       | p.(Trp41*)              | 1             | 0.0000088     |
| 94578532                                  | rs764744217  | c.157G>T                       | p.(Glu53*)              | 0             | 0.0000000     |
| 94577045                                  | rs778817150  | c.247_250dupCAAA               | p.(Ser84Thrfs*16)       | 1             | 0.0000088     |
| 94577038                                  |              | c.256_257delAC                 | p.(Thr86Profs*12)       | 1             | 0.0000088     |
| 94576993                                  | rs61751413   | c.302+1G>A                     | p.?                     | 0             | 0.0000000     |
| 94574256                                  | rs765429911  | c.319C>T                       | p.(Arg107*)             | 8             | 0.0000619     |
| 94574242                                  | rs749252902  | c.331_332delGA                 | p.(Glu111Thrfs*49)      | 1             | 0.0000088     |
| 94574209                                  | rs1275663715 | c.365_366insCA                 | p.(Gly123Metfs*32)      | 1             | 0.0000088     |
| 94574203                                  | rs745550261  | c.353_371dupAGAGCCAGCACCTTGCCG | p.(Ile125Glufs*42)      | 1             | 0.0000088     |
| 94574132                                  | rs754112731  | c.442+1G>A                     | p.?                     | 0             | 0.0000000     |
| 94568699                                  | rs755916591  | c.443-2dupA                    | p.?                     | 0             | 0.0000000     |
| 94568699                                  | rs755916591  | c.443-5_443-2delTGTA           | p.?                     | 0             | 0.0000000     |
| 94568687                                  | rs62646861   | c.454C>T                       | p.(Arg152*)             | 4             | 0.0000352     |
| 94568649                                  | rs747950242  | c.488_491delTGAC               | p.(Leu163Hisfs*18)      | 1             | 0.0000088     |
| 94564549                                  | rs61748534   | c.571-2A>T                     | p.?                     | 1             | 0.0000091     |
| 94564463                                  | rs757557272  | c.655A>T                       | p.(Arg219*)             | 0             | 0.0000000     |

| Genomic position | rs ID        | cDNA notation                | Protein notation    | AC gnomAD nFE | AF gnomAD nFE |
|------------------|--------------|------------------------------|---------------------|---------------|---------------|
| 94564439         | rs63749081   | c.666_678delAAAGACGGTGCGC    | p.(Lys223Metfs*14)  | 0             | 0.0000000     |
| 94564428         | rs763596438  | c.690C>A                     | p.(Cys230*)         | 0             | 0.0000000     |
| 94564402         | rs755733328  | c.716G>A                     | p.(Trp239*)         | 1             | 0.0000088     |
| 94548999         | rs754536977  | c.769-2A>G                   | p.?                 | 0             | 0.0000000     |
| 94548926         | rs757774731  | c.838_839delAT               | p.(Met280Valfs*41)  | 0             | 0.0000000     |
| 94548907         | rs750954445  | c.858+1G>T                   | p.?                 | 0             | 0.0000000     |
| 94546276         | rs769352013  | c.859-2A>G                   | p.?                 | 0             | 0.0000000     |
| 94546247         | rs747346334  | c.885delC                    | p.(Leu296Cysfs*4)   | 4             | 0.0000354     |
| 94546182         | rs761093501  | c.950delG                    | p.(Gly317Alafs*57)  | 1             | 0.0000088     |
| 94546151         | rs61751418   | c.982G>T                     | p.(Glu328*)         | 1             | 0.0000088     |
| 94546094         | rs764915204  | c.1025_1038delACAATAACTATAAG | p.(Asp342Glyfs*6)   | 0             | 0.0000000     |
| 94544906         | rs150686179  | c.1211C>G                    | p.(Ser404*)         | 1             | 0.0000088     |
| 94544895         | rs61748550   | c.1222C>T                    | p.(Arg408*)         | 3             | 0.0000232     |
| 94544877         | rs765707028  | c.1239+1G>C                  | p.?                 | 1             | 0.0000077     |
| 94544199         | rs948132728  | c.1302delA                   | p.(Gln437Argfs*12)  | 1             | 0.0000088     |
| 94544185         | rs61752391   | c.1317G>A                    | p.(Trp439*)         | 3             | 0.0000264     |
| 94543380         | rs780874319  | c.1419delT                   | p.(Thr474Leufs*6)   | 0             | 0.0000000     |
| 94543244         | rs763808930  | c.1554+2T>C                  | p.?                 | 1             | 0.0000089     |
| 94528866         | rs1279522242 | c.1561delG                   | p.(Val521Serfs*47)  | 0             | 0.0000000     |
| 94528787         | rs1043103980 | c.1640delT                   | p.(Phe547Serfs*21)  | 1             | 0.0000088     |
| 94528731         | rs943713680  | c.1696delC                   | p.(His566Thrfs*2)   | 0             | 0.0000000     |
| 94528311         | rs754765164  | c.1761-2A>G                  | p.?                 | 1             | 0.0000089     |
| 94528240         | rs771051333  | c.1830T>A                    | p.(Tyr610*)         | 1             | 0.0000088     |
| 94528164         | rs145961131  | c.1906C>T                    | p.(Gln636*)         | 5             | 0.0000441     |
| 94528147         | rs1256814849 | c.1922dupG                   | p.(Cys641Trpfs*125) | 0             | 0.0000000     |
| 94528132         | rs61752401   | c.1937+1G>A                  | p.?                 | 0             | 0.0000000     |
| 94526316         | rs61751263   | c.1938-1G>A                  | p.?                 | 0             | 0.0000000     |
| 94526258         | rs757302286  | c.1995C>A                    | p.(Tyr665*)         | 0             | 0.0000000     |
| 94526212         | rs61749423   | c.2041C>T                    | p.(Arg681*)         | 1             | 0.0000088     |
| 94526154         | rs61749425   | c.2099G>A                    | p.(Trp700*)         | 1             | 0.0000088     |
| 94526092         | rs61749427   | c.2160+1G>C                  | p.?                 | 1             | 0.0000088     |
| 94522379         | rs1401924846 | c.2161-1G>A                  | p.?                 | 0             | 0.0000000     |
| 94564463         | rs757557272  | c.655A>T                     | p.(Arg219*)         | 0             | 0.0000000     |
| 94564439         | rs63749081   | c.666_678delAAAGACGGTGCGC    | p.(Lys223Metfs*14)  | 0             | 0.0000000     |

| Genomic position | rs ID        | cDNA notation                | Protein notation    | AC gnomAD nFE | AF gnomAD nFE |
|------------------|--------------|------------------------------|---------------------|---------------|---------------|
| 94564428         | rs763596438  | c.690C>A                     | p.(Cys230*)         | 0             | 0.0000000     |
| 94564402         | rs755733328  | c.716G>A                     | p.(Trp239*)         | 1             | 0.0000088     |
| 94548999         | rs754536977  | c.769-2A>G                   | p.?                 | 0             | 0.0000000     |
| 94548926         | rs757774731  | c.838 839delAT               | p.(Met280Valfs*41)  | 0             | 0.0000000     |
| 94548907         | rs750954445  | c.858+1G>T                   | p.?                 | 0             | 0.0000000     |
| 94546276         | rs769352013  | c.859-2A>G                   | p.?                 | 0             | 0.0000000     |
| 94546247         | rs747346334  | c.885delC                    | p.(Leu296Cysfs*4)   | 4             | 0.0000354     |
| 94546182         | rs761093501  | c.950delG                    | p.(Gly317Alafs*57)  | 1             | 0.0000088     |
| 94546151         | rs61751418   | c.982G>T                     | p.(Glu328*)         | 1             | 0.0000088     |
| 94546094         | rs764915204  | c.1025 1038delACAATAACTATAAG | p.(Asp342Glyfs*6)   | 0             | 0.0000000     |
| 94544906         | rs150686179  | c.1211C>G                    | p.(Ser404*)         | 1             | 0.0000088     |
| 94544895         | rs61748550   | c.1222C>T                    | p.(Arg408*)         | 3             | 0.0000232     |
| 94544877         | rs765707028  | c.1239+1G>C                  | p.?                 | 1             | 0.0000077     |
| 94544199         | rs948132728  | c.1302delA                   | p.(Gln437Argfs*12)  | 1             | 0.0000088     |
| 94544185         | rs61752391   | c.1317G>A                    | p.(Trp439*)         | 3             | 0.0000264     |
| 94543380         | rs780874319  | c.1419delT                   | p.(Thr474Leufs*6)   | 0             | 0.0000000     |
| 94543244         | rs763808930  | c.1554+2T>C                  | p.?                 | 1             | 0.0000089     |
| 94528866         | rs1279522242 | c.1561delG                   | p.(Val521Serfs*47)  | 0             | 0.0000000     |
| 94528787         | rs1043103980 | c.1640delT                   | p.(Phe547Serfs*21)  | 1             | 0.0000088     |
| 94528731         | rs943713680  | c.1696delC                   | p.(His566Thrfs*2)   | 0             | 0.0000000     |
| 94528311         | rs754765164  | c.1761-2A>G                  | p.?                 | 1             | 0.0000089     |
| 94528240         | rs771051333  | c.1830T>A                    | p.(Tyr610*)         | 1             | 0.0000088     |
| 94528164         | rs145961131  | c.1906C>T                    | p.(Gln636*)         | 5             | 0.0000441     |
| 94528147         | rs1256814849 | c.1922dupG                   | p.(Cys641Trpfs*125) | 0             | 0.0000000     |
| 94528132         | rs61752401   | c.1937+1G>A                  | p.?                 | 0             | 0.0000000     |
| 94526316         | rs61751263   | c.1938-1G>A                  | p.?                 | 0             | 0.0000000     |
| 94526258         | rs757302286  | c.1995C>A                    | p.(Tyr665*)         | 0             | 0.0000000     |
| 94526212         | rs61749423   | c.2041C>T                    | p.(Arg681*)         | 1             | 0.0000088     |
| 94526154         | rs61749425   | c.2099G>A                    | p.(Trp700*)         | 1             | 0.0000088     |
| 94526092         | rs61749427   | c.2160+1G>C                  | p.?                 | 1             | 0.0000088     |
| 94522379         | rs1401924846 | c.2161-1G>A                  | p.?                 | 0             | 0.0000000     |
| 94520873         | rs777634165  | c.2383-2A>G                  | p.?                 | 1             | 0.0000089     |
| 94520733         | rs143100856  | c.2521C>T                    | p.(Gln841*)         | 1             | 0.0000088     |
| 94520690         | rs61752406   | c.2564G>A                    | p.(Trp855*)         | 4             | 0.0000352     |

| Genomic position | rs ID        | cDNA notation         | Protein notation    | AC gnomAD nFE | AF gnomAD nFE |
|------------------|--------------|-----------------------|---------------------|---------------|---------------|
| 94520666         | rs61749439   | c.2587+1G>A           | p.?                 | 0             | 0.0000000     |
| 94517238         | rs751791095  | c.2603delC            | p.(Pro868Hisfs*33)  | 0             | 0.0000000     |
| 94517188         | rs1212420029 | c.2653+1G>T           | p.?                 | 2             | 0.0000176     |
| 94517187         | rs762823337  | c.2653+2T>C           | p.?                 | 1             | 0.0000088     |
| 94517186         | rs766646086  | c.2653+2delT          | p.?                 | 0             | 0.0000000     |
| 94512528         | rs773330082  | c.2864delA            | p.(Glu955Glyfs*22)  | 1             | 0.0000088     |
| 94512504         | rs61752410   | c.2888delG            | p.(Gly963Alafs*14)  | 0             | 0.0000000     |
| 94512501         | rs761689153  | c.2891delA            | p.(His964Profs*13)  | 0             | 0.0000000     |
| 94511452         | rs1180769486 | c.2765delC            | p.(His922Leufs*10)  | 1             | 0.0000210     |
| 94511450         |              | c.2768G>A             | p.(Trp923*)         | 0             | 0.0000000     |
| 94511397         | rs1373701354 | c.2814_2820delCCCACGT | p.(Glu939Valfs*9)   | 0             | 0.0000000     |
| 94511391         | rs1436534085 | c.2825_2826delCA      | p.(Gly942Alafs*53)  | 0             | 0.0000000     |
| 94511353         | rs1474617872 | c.2864delC            | p.(Glu955Glyfs*22)  | 0             | 0.0000000     |
| 94511313         | rs1032359778 | c.2905A>T             | p.(Lys969*)         | 0             | 0.0000000     |
| 94508456         | rs61752415   | c.3191-2A>G           | p.?                 | 1             | 0.0000088     |
| 94508455         | rs767854160  | c.3191-1G>T           | p.?                 | 2             | 0.0000176     |
| 94508433         | rs61750065   | c.3210_3211dupGT      | p.(Ser1071Cysfs*14) | 4             | 0.0000352     |
| 94506960         | rs1324958803 | c.3329-2A>T           | p.?                 | 2             | 0.0000176     |
| 94506959         | rs544428779  | c.3329-1G>A           | p.?                 | 1             | 0.0000088     |
| 94506884         | rs1057517701 | c.3403C>T             | p.(Gln1135*)        | 1             | 0.0000650     |
| 94506785         | rs1472949364 | c.3501delG            | p.(Ser1168Alafs*28) | 0             | 0.0000000     |
| 94506764         | rs1265840106 | c.3522+1G>T           | p.?                 | 0             | 0.0000000     |
| 94505685         | rs1168144507 | c.3523-2A>G           | p.?                 | 0             | 0.0000000     |
| 94505684         | rs766239144  | c.3523-1G>A           | p.?                 | 4             | 0.0000331     |
| 94502847         | rs755283743  | c.3665_3666delTG      | p.(Val1222Glyfs*14) | 0             | 0.0000000     |
| 94502832         | rs751987031  | c.3681dupA            | p.(Glu1228Argfs*9)  | 0             | 0.0000000     |
| 94502760         | rs61752423   | c.3754G>T             | p.(Glu1252*)        | 0             | 0.0000000     |
| 94497601         | rs769687104  | c.3863-2A>G           | p.?                 | 0             | 0.0000000     |
| 94497591         | rs746541266  | c.3871C>T             | p.(Gln1291*)        | 1             | 0.0000090     |
| 94497588         | rs61752426   | c.3874C>T             | p.(Gln1292*)        | 2             | 0.0000158     |
| 94497564         | rs61752427   | c.3898C>T             | p.(Arg1300*)        | 0             | 0.0000000     |
| 94497427         | rs760519654  | c.4033_4034dupAA      | p.(Asn1345Lysfs*45) | 0             | 0.0000000     |
| 94497417         | rs1184956177 | c.4044dupA            | p.(Gln1349Thrfs*73) | 0             | 0.0000000     |
| 94496665         | rs139109485  | c.4139delC            | p.(Pro1380Argfs*9)  | 0             | 0.0000000     |

| Genomic position | rs ID        | cDNA notation                | Protein notation    | AC gnomAD nFE | AF gnomAD nFE |
|------------------|--------------|------------------------------|---------------------|---------------|---------------|
| 94496610         | rs62642573   | c.4195G>T                    | p.(Glu1399*)        | 0             | 0.0000000     |
| 94496571         | rs61750137   | c.4234C>T                    | p.(Gln1412*)        | 2             | 0.0000155     |
| 94496045         | rs745544039  | c.4290delT                   | p.(Ala1431Glnfs*5)  | 0             | 0.0000000     |
| 94496027         | rs1283350532 | c.4309A>T                    | p.(Lys1437*)        | 0             | 0.0000000     |
| 94495983         | rs200967229  | c.4352+1G>A                  | p.?                 | 2             | 0.0000176     |
| 94495143         | rs1341069538 | c.4383_4396delGAAGACTCCTTCTG | p.(Trp1461Cysfs*89) | 0             | 0.0000000     |
| 94495097         | rs1311903227 | c.4442dupA                   | p.(Val1482Glyfs*73) | 0             | 0.0000000     |
| 94495034         | rs61750149   | c.4506C>A                    | p.(Cys1502*)        | 1             | 0.0000123     |
| 94495003         | rs281865377  | c.4537del                    | p.(Gln1513Argfs*13) | 0             | 0.0000000     |
| 94495001         |              | c.4538_4539insC              | p.(Gln1513Hisfs*42) | 0             | 0.0000000     |
| 94490606         | rs61752435   | c.4540-2A>G                  | p.?                 | 1             | 0.0000088     |
| 94490605         | rs754703493  | c.4540-1G>C                  | p.?                 | 0             | 0.0000000     |
| 94490530         | rs754897752  | c.4614T>A                    | p.(Tyr1538*)        | 1             | 0.0000088     |
| 94490509         | rs767312869  | c.4634+1G>A                  | p.?                 | 0             | 0.0000000     |
| 94488972         | rs1131691612 | c.4637T>A                    | p.(Leu1546*)        | 1             | 0.0000089     |
| 94488941         | rs751319688  | c.4667+1G>A                  | p.?                 | 1             | 0.0000089     |
| 94488940         | rs61752436   | c.4667+2T>C                  | p.?                 | 1             | 0.0000089     |
| 94487508         | rs1439783011 | c.4668-1G>T                  | p.?                 | 1             | 0.0000648     |
| 94487456         | rs1340989734 | c.4715_4718dupCGGG           | p.(Glu1574Glyfs*24) | 0             | 0.0000000     |
| 94487455         | rs1282472315 | c.4720G>T                    | p.(Glu1574*)        | 0             | 0.0000000     |
| 94487454         |              | c.4720delG                   | p.(Glu1574Lysfs*7)  | 0             | 0.0000000     |
| 94487442         | rs758862120  | c.4731_4732delTG             | p.(Gly1578Valfs*18) | 0             | 0.0000000     |
| 94487401         | rs61751376   | c.4773+1G>A                  | p.?                 | 0             | 0.0000000     |
| 94486966         | rs61750156   | c.4849-1G>A                  | p.?                 | 4             | 0.0000353     |
| 94486960         | rs61752439   | c.4854G>A                    | p.(Trp1618*)        | 0             | 0.0000000     |
| 94486933         | rs763911476  | c.4880delT                   | p.(Leu1627Argfs*35) | 1             | 0.0000088     |
| 94486886         | rs760706416  | c.4924_4927delAGCC           | p.(Ser1642Cysfs*19) | 0             | 0.0000000     |
| 94486818         | rs773880325  | c.4996G>T                    | p.(Glu1666*)        | 2             | 0.0000176     |
| 94485171         | rs144619288  | c.5161_5162delAC             | p.(Thr1721Hisfs*65) | 2             | 0.0000181     |
| 94485164         | rs867654589  | c.5169delC                   | p.(Trp1724Glyfs*2)  | 0             | 0.0000000     |
| 94485158         | rs1057518955 | c.5175dupG                   | p.(Thr1726Aspfs*61) | 1             | 0.0000091     |
| 94485145         | rs886044747  | c.5189G>A                    | p.(Trp1730*)        | 1             | 0.0000094     |
| 94485137         | rs61751377   | c.5196+1G>A                  | p.?                 | 2             | 0.0000193     |
| 94481294         | rs886044750  | c.5312+1G>A                  | p.?                 | 1             | 0.0000649     |

| Genomic position | rs ID        | cDNA notation                                                                      | Protein notation    | AC gnomAD nFE | AF gnomAD nFE |
|------------------|--------------|------------------------------------------------------------------------------------|---------------------|---------------|---------------|
| 94481293         | rs1307108997 | c.5312+2T>G                                                                        | p.?                 | 1             | 0.0000088     |
| 94480248         | rs759513613  | c.5313-2A>G                                                                        | p.?                 | 1             | 0.0000088     |
| 94480244         | rs776757706  | c.5315G>A                                                                          | p.(Trp1772*)        | 1             | 0.0000088     |
| 94480243         | rs61750571   | c.5316G>A                                                                          | p.(Trp1772*)        | 1             | 0.0000088     |
| 94480222         | rs61750573   | c.5337C>A                                                                          | p.(Tyr1779*)        | 1             | 0.0000088     |
| 94480098         | rs61753030   | c.5460+1G>C                                                                        | p.?                 | 1             | 0.0000088     |
| 94480098         | rs61753030   | c.5460+1G>T                                                                        | p.?                 | 0             | 0.0000000     |
| 94476817         | rs773876335  | c.5584+1G>A                                                                        | p.?                 | 1             | 0.0000088     |
| 94476454         | rs748184137  | c.5616G>A                                                                          | p.(Trp1872*)        | 1             | 0.0000088     |
| 94476355         | rs1232476760 | c.5714+1G>A                                                                        | p.?                 | 0             | 0.0000000     |
| 94474362         | rs1305924893 | c.5778_5779delAA                                                                   | p.(Arg1927Asnfs*7)  | 0             | 0.0000000     |
| 94474306         | rs1475966997 | c.5835+1G>T                                                                        | p.?                 | 0             | 0.0000000     |
| 94473854         | rs61750637   | c.5836-2delA                                                                       | p.?                 | 1             | 0.0000088     |
| 94473286         | rs886044756  | c.5899-53_5908delATTATTAGACCTTCTTGATCTCTAGGGCCAGGCTAGCTCTGTGTTTTCTCCTAGTGCCTTTGGCC | p.?                 | 0             | 0.0000000     |
| 94473277         | rs61751389   | c.5917delG                                                                         | p.(Val1973*)        | 2             | 0.0000177     |
| 94473259         | rs61753037   | c.5935delA                                                                         | p.(Thr1979Glnfs*13) | 0             | 0.0000000     |
| 94471056         | rs61751383   | c.6088C>T                                                                          | p.(Arg2030*)        | 2             | 0.0000176     |
| 94471036         | rs779751119  | c.6108T>A                                                                          | p.(Tyr2036*)        | 0             | 0.0000000     |
| 94471026         | rs61753038   | c.6118C>T                                                                          | p.(Arg2040*)        | 1             | 0.0000077     |
| 94467550         | rs1162214541 | c.6148-2A>G                                                                        | p.?                 | 1             | 0.0000088     |
| 94467413         | rs770453727  | c.6282+1G>C                                                                        | p.?                 | 2             | 0.0000176     |
| 94466649         | rs1176862742 | c.6283-6_6294delCCCCAGGATGAGCCCACC                                                 | p.?                 | 1             | 0.0000088     |
| 94466630         | rs779353744  | c.6313delG                                                                         | p.(Ala2105Hisfs*10) | 1             | 0.0000088     |
| 94466557         | rs745654673  | c.6386+1G>A                                                                        | p.?                 | 0             | 0.0000000     |
| 94466556         | rs61753043   | c.6386+2C>G                                                                        | p.?                 | 1             | 0.0000088     |
| 94466426         | rs61750654   | c.6445C>T                                                                          | p.(Arg2149*)        | 3             | 0.0000264     |
| 94463532         | rs1193437578 | c.6606_6613delCTACAACA                                                             | p.(Tyr2203Alafs*45) | 0             | 0.0000000     |
| 94463488         | rs61753046   | c.6658C>T                                                                          | p.(Gln2220*)        | 0             | 0.0000000     |
| 94463476         | rs1425217062 | c.6639_6669dupCTCCCTGGCGAGGATCTTCAGCTCCTCCTC                                       | p.(Ser2224Leufs*37) | 1             | 0.0000088     |
| 94461694         | rs998363634  | c.6787C>T                                                                          | p.(Arg2263*)        | 2             | 0.0001296     |
| 94461676         | rs372234578  | c.6805C>T                                                                          | p.(Arg2269*)        | 2             | 0.0000176     |

| Genomic position                                                                | rs ID        | cDNA notation | Protein notation                                    | AC gnomAD nFE | AF gnomAD nFE |
|---------------------------------------------------------------------------------|--------------|---------------|-----------------------------------------------------|---------------|---------------|
| 94461664                                                                        | rs773599043  | c.6816+1G>A   | p.?                                                 | 0             | 0.0000000     |
| 94461664                                                                        | rs773599043  | c.6816+1G>T   | p.?                                                 | 0             | 0.0000000     |
| 94458799                                                                        | rs775865861  | c.6817-1G>A   | p.?                                                 | 1             | 0.0000088     |
| <i>Total truncating variants</i>                                                |              |               |                                                     | 135           | 0.0014685     |
| <b>Non-canonical splice site variants with &lt;25% normal RNA<sup>2-6</sup></b> |              |               |                                                     |               |               |
| 94577135                                                                        | rs150774447  | c.161G>T      | p.[Cys54Serfs*14,Cys54Tyr]                          | 0             | 0.0000000     |
| 94576990                                                                        |              | c.302+4A>C    | p.(Cys54Serfs*14)                                   | 0             | 0.0000000     |
| 94574275                                                                        |              | c.303-3C>G    | p.[Cys54*,Leu102Alafs*14]                           | 0             | 0.0000000     |
| 94564350                                                                        | rs62645944   | c.768G>T      | p.(Leu257Valfs*17)                                  | 24            | 0.0001858     |
| 94545023                                                                        | rs780127258  | c.1100-6T>A   | p.(Thr367Serfs*6)                                   | 1             | 0.0000088     |
| 94528128                                                                        |              | c.1937+5G>A   | p.(Tyr603_Ser646del)                                | 0             | 0.0000000     |
| 94528120                                                                        |              | c.1937+13T>G  | p.[Phe647*,=]                                       | 0             | 0.0000000     |
| 94522386                                                                        |              | c.2161-8G>A   | p.(His721_Val794del)                                | 0             | 0.0000000     |
| 94514521                                                                        | rs765263670  | c.2654-8T>G   | p.[Gly863Valfs*47,=]                                | 0             | 0.0000080     |
| 94510164                                                                        | rs61751262   | c.3050+5G>A   | p.(Leu973_His1017delinsPhe)                         | 0             | 0.0000000     |
| 94508465                                                                        |              | c.3191-11T>A  | p.(Gly1064delinsValProProGly)                       | 0             | 0.0000000     |
| 94505599                                                                        | rs1064793011 | c.3607G>A     | p.(Thr1176Metfs*2)                                  | 0             | 0.0000000     |
| 94505596                                                                        |              | c.3607+3A>T   | p.(Thr1176Metfs*2)                                  | 0             | 0.0000000     |
| 94502702                                                                        |              | c.3812A>G     | p.(Gly1203Aspfs*10)                                 | 0             | 0.0000000     |
| 94502701                                                                        |              | c.3813G>C     | p.(Gly1203Aspfs*10)                                 | 0             | 0.0000000     |
| 94497334                                                                        | rs1064797113 | c.4128G>A     | p.(Gln1376_Ile1377ins4)                             | 0             | 0.0000000     |
| 94497334                                                                        | rs1064797113 | c.4128G>C     | p.(Gln1376_Ile1377insValLeuLeuSer)                  | 0             | 0.0000000     |
| 94496679                                                                        |              | c.4129-3C>T   | p.[=,Ile1377Hisfs*3,Gly1288Aspfs*45]                | 0             | 0.0000000     |
| 94496548                                                                        | rs61754044   | c.4253+4C>T   | p.(Ile1377Hisfs*3)                                  | 2             | 0.0000176     |
| 94496547                                                                        | rs61750138   | c.4253+5G>A   | p.(Ile1377Hisfs*3)                                  | 1             | 0.0000088     |
| 94496547                                                                        |              | c.4253+5G>T   | p.[Ile1377Hisfs*3,=]                                | 0             | 0.0000000     |
| 94495002                                                                        |              | c.4538A>C     | p.[Pro1513_Arg1514ins10,Cys1490Glufs*12,Gln1513Pro] | 0             | 0.0000000     |
| 94495002                                                                        | rs281865402  | c.4538A>G     | p.[Arg1513_Arg1514ins10,Cys1490Glufs*12]            | 0             | 0.0000000     |
| 94495001                                                                        |              | c.4539G>A     | p.[Cys1490Glufs*12,=]                               | 0             | 0.0000000     |
| 94490612                                                                        |              | c.4540-8T>A   | p.(Gln1513insProGln)                                | 0             | 0.0000000     |
| 94488942                                                                        | rs1385119665 | c.4667G>C     | p.(Ser1545_Gln1555del)                              | 0             | 0.0000000     |
| 94488942                                                                        |              | c.4667G>A     | p.(Ser1545_Gln1555del)                              | 0             | 0.0000000     |



| Genomic position                                                            | rs ID        | cDNA notation                      | Protein notation                                   | AC gnomAD nFE | AF gnomAD nFE    |
|-----------------------------------------------------------------------------|--------------|------------------------------------|----------------------------------------------------|---------------|------------------|
| 94487402                                                                    |              | c.4773G>C                          | p.[Tyr1557_Val1673del,Tyr1557Alafs*18]             | 0             | 0.0000000        |
| 94487399                                                                    | rs759672616  | c.4773+3A>G                        | p.[Tyr1557Alafs*18,=]                              | 18            | 0.0001394        |
| 94487397                                                                    |              | c.4773+5G>A                        | p.[Tyr1557Alafs*18,=,Tyr1557_Val1673del]           | 0             | 0.0000000        |
| 94487193                                                                    |              | c.4848+3A>G                        | p.[Gly1592_Lys1616del,=]                           | 0             | 0.0000000        |
| 94486791                                                                    |              | c.5018+5G>A                        | p.(Val1617Alafs*113)                               | 0             | 0.0000000        |
| 94485131                                                                    | rs61753023   | c.5196+3_5196+6delAAGT             | p.(Val1617_Ile1732del)                             | 1             | 0.0000099        |
| 94481292                                                                    |              | c.5312+3A>T                        | p.(Asn1734Glyfs*14)                                | 0             | 0.0000000        |
| 94480249                                                                    |              | c.5313-3C>G                        | p.(Trp1772Aspfs*7)                                 | 0             | 0.0000000        |
| 94480094                                                                    |              | c.5460+5G>A                        | p.(Trp1772Argfs*9)                                 | 0             | 0.0000000        |
| 94476951                                                                    | rs1800728    | c.5461-10T>C                       | p.[Thr1821Aspfs*6,Thr1821Valfs*13]                 | 58            | 0.0004509        |
| 94476949                                                                    |              | c.5461-8T>G                        | p.(Thr1821Aspfs*6)                                 | 0             | 0.0000000        |
| 94476947                                                                    |              | c.5461-6T>G                        | p.(Thr1821Aspfs*6)                                 | 0             | 0.0000000        |
| 94476813                                                                    | rs61750576   | c.5584+5G>A                        | p.[Thr1821Aspfs*6,Thr1821Valfs*13]                 | 0             | 0.0000000        |
| 94476812                                                                    | rs61750633   | c.5584+6T>C                        | p.[Thr1821Aspfs*6,Thr1821Valfs*13,Glu1863Leufs*33] | 0             | 0.0000000        |
| 94476818                                                                    |              | c.5584G>C                          | p.(Thr1821Aspfs*6)                                 | 0             | 0.0000000        |
| 94474432                                                                    |              | c.5715-5T>G                        | p.[Thr1821Serfs*34,=]                              | 0             | 0.0000000        |
| 94473856                                                                    | rs1064793013 | c.5836-3C>A                        | p.(Lys1945_Ile1946Pheins10)                        | 0             | 0.0000000        |
| 94473786                                                                    | rs922818626  | c.5898+5del                        | p.(Cys1967Valfs*24)                                | 0             | 0.0000000        |
| 94470997                                                                    |              | c.6147G>A                          | p.(Ser2002Argfs*11)                                | 0             | 0.0000000        |
| 94466388                                                                    |              | c.6479+4A>G                        | p.(Ser2129_Lys2160delinsArg)                       | 0             | 0.0000000        |
| 94463397                                                                    | rs749526785  | c.6729+5_6729+19delGTTGGCCCTGGGGCA | p.(Phe2161Cysfs*3)                                 | 0             | 0.0000000        |
| <i>Total severe non-canonical splice site variants</i>                      |              |                                    |                                                    | <b>105</b>    | <b>0.0008211</b> |
| <b><i>Deep-intronic variants with &lt;25% normal RNA<sup>3-11</sup></i></b> |              |                                    |                                                    |               |                  |
| 94566773                                                                    | rs888731641  | c.570+1798A>G                      | p.(Phe191Leufs*6)                                  | 0             | 0.0000000        |
| 94549785                                                                    |              | c.769-788A>T                       | p.[Leu257Aspfs*3,=]                                | 0             | 0.0000000        |
| 94546914                                                                    |              | c.859-640A>G                       | p.(Phe287Tyrfs*69)                                 | 0             | 0.0000000        |
| 94546814                                                                    |              | c.859-540C>G                       | p.(Phe287Tyrfs*33)                                 | 0             | 0.0000000        |
| 94546780                                                                    |              | c.859-506G>C                       | p.[Phe287Thrfs*32,=]                               | 0             | 0.0000000        |
| 94528096                                                                    |              | c.1937+37C>G                       | p.(Phe647*)                                        | 0             | 0.0000000        |
| 94526934                                                                    |              | c.1938-619A>G                      | p.[Phe647Alafs*22,Phe647Serfs*22,=]                | 0             | 0.0000000        |
| 94526829                                                                    |              | c.1938-514A>G                      | p.[Phe647Serfs*155,Phe647Serfs*22,=]               | 0             | 0.0000000        |
| 94517960                                                                    |              | c.2588-706C>T                      | p.[Gly863Alafs*3,=]                                | 0             | 0.0000000        |
| 94511126                                                                    |              | c.2919-826T>A                      | p.[Leu973Phefs*1,=]                                | 0             | 0.0000000        |

| Genomic position                           | rs ID       | cDNA notation  | Protein notation                     | AC gnomAD nFE | AF gnomAD nFE    |
|--------------------------------------------|-------------|----------------|--------------------------------------|---------------|------------------|
| 94509799                                   |             | c.3050+370C>T  | p.(Leu1018Glufs*4)                   | 0             | 0.0000000        |
| 94495923                                   |             | c.4352+61G>A   | p.[Glu1452*,=]                       | 0             | 0.0000000        |
| 94493901                                   |             | c.4539+1100A>G | p.[Arg1514Valfs*31,Arg1514Glyfs*3,=] | 0             | 0.0000000        |
| 94493895                                   |             | c.4539+1106C>T | p.[Arg1514Glyfs*3,Arg1514Valfs*31,=] | 0             | 0.0000000        |
| 94492937                                   |             | c.4539+2064C>T | p.[Arg1514Leufs*36,=]                | 0             | 0.0000000        |
| 94489769                                   |             | c.4634+741A>G  | p.[Ser1545Serfs*51,=]                | 0             | 0.0000000        |
| 94484125                                   | rs886044748 | c.5196+1013A>G | p.(Met1733Valfs*2)                   | 0             | 0.0000000        |
| 94484082                                   | rs886044749 | c.5196+1056A>G | p.[Met1733Valfs*2,=]                 | 0             | 0.0000000        |
| 94481967                                   |             | c.5197-557G>T  | p.(Met1733*)                         | 0             | 0.0000000        |
| <i>Total severe deep-intronic variants</i> |             |                |                                      | 0             | 0.0000000        |
| <b>Total loss-of-function variants</b>     |             |                |                                      | <b>240</b>    | <b>0.0022896</b> |

AC: allele count, AF: allele frequency, gnomAD: genome Aggregation Database, nFE: non-Finnish European

**eTable 2.** Origin of Participants

| Country of residence | Number of cases | Predominant ethnicity     | Non-Finnish European cases count |
|----------------------|-----------------|---------------------------|----------------------------------|
| Argentina            | 8               | non-Finnish European 90%  | 7                                |
| Australia            | 33              | non-Finnish European 85%  | 28                               |
| Brazil               | 6               | non-Finnish European 90%  | 5                                |
| Canada               | 2               | non-Finnish European 100% | 2                                |
| Czech Republic       | 42              | non-Finnish European 100% | 42                               |
| France               | 110             | non-Finnish European 95%  | 104                              |
| Germany              | 62              | non-Finnish European 90%  | 55                               |
| Greece               | 3               | non-Finnish European 100% | 3                                |
| Ireland              | 17              | non-Finnish European 90%  | 15                               |
| Israel               | 17              | Ashkenazi Jewish 100%     | 0                                |
| Italy                | 20              | non-Finnish European 90%  | 18                               |
| Japan                | 5               | East Asian 100%           | 0                                |
| Netherlands          | 34              | non-Finnish European 100% | 34                               |
| New Zealand          | 12              | non-Finnish European 75%  | 9                                |
| Palestine            | 10              | Arab 100%                 | 0                                |
| Poland               | 14              | non-Finnish European 100% | 14                               |
| Slovenia             | 11              | non-Finnish European 100% | 11                               |
| South-Africa         | 94              | non-Finnish European 70%  | 65                               |
| Spain                | 36              | non-Finnish European 90%  | 32                               |
| United States        | 14              | non-Finnish European 90%  | 12                               |
|                      | 550             |                           | <b>456 (83%)</b>                 |

**eFigure 1. Age Distribution by Sex**

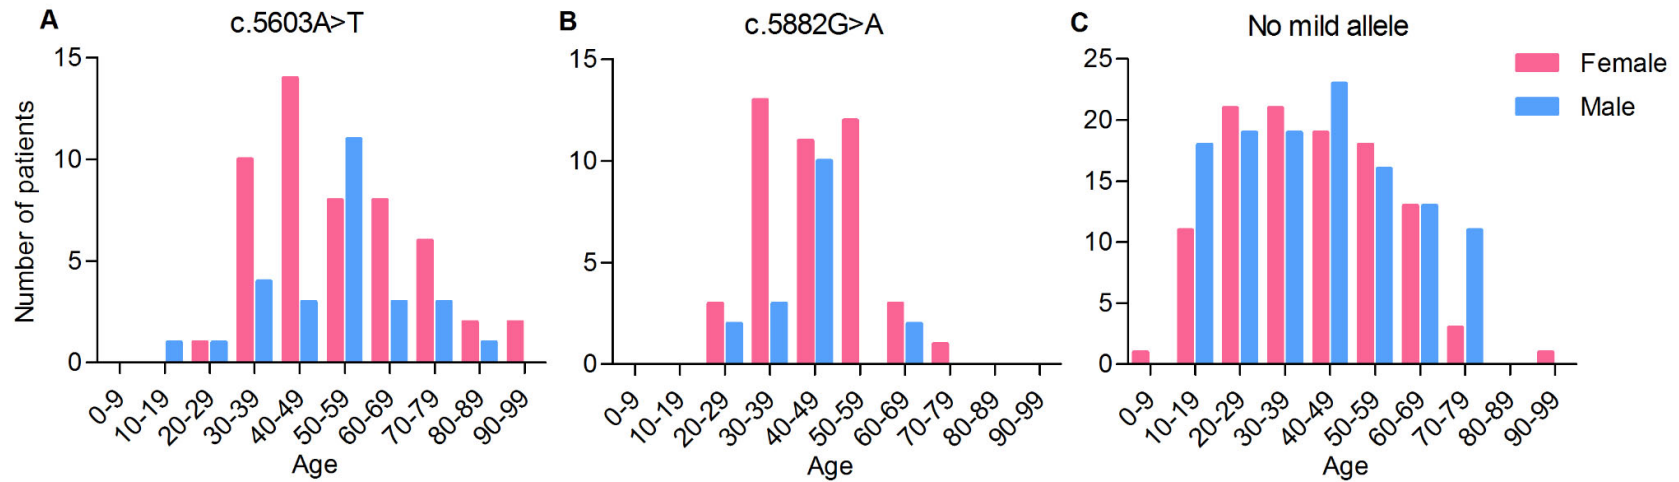

A. Among c.5603A>T cases, median age was 51 years and 53 years for women and men, respectively (Mann-Whitney U,  $p=.971$ ). B. Female patients carrying c.5882G>A had a median age of 44 years and male patients of 45 years (Mann-Whitney U,  $p=.664$ ). C. Women and men who did not carry a mild allele had a median age of 40 and 42 years, respectively (Mann-Whitney U,  $p=.633$ ).

**eFigure 2.** Age of Onset Distribution by Sex

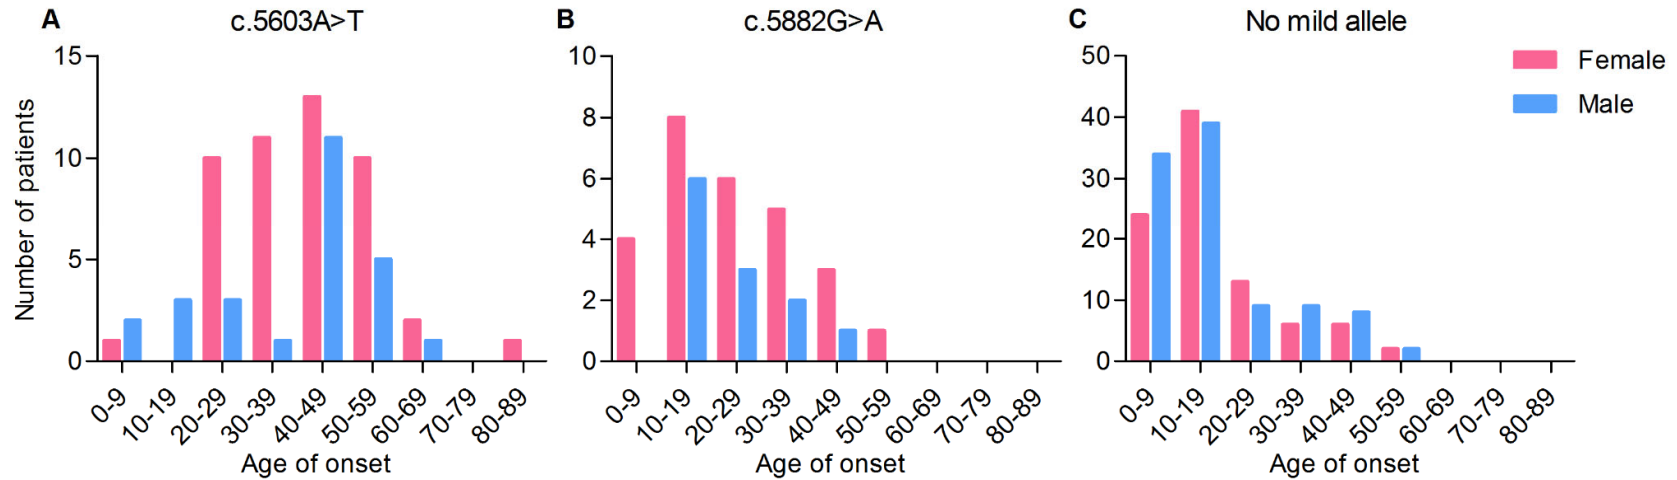

A. The distribution of age of onset among female patients carrying c.5603A>T was primarily bell-shaped, whereas its distribution among men appeared bimodal, although patient numbers were low. B. In the c.5882G>A subgroup, age at onset was slightly right-skewed. C. Among patients carrying none of the mild alleles, the distribution of age of onset was clearly right-skewed, likely due to the fact that the vast majority of these individuals carried two (moderately) severe alleles and only a minority of variants could have a mild effect.

**eFigure 3.** Sex-Specific Penetrance Estimates for *ABCA4* Alleles c.5603A>T and c.5882G>A

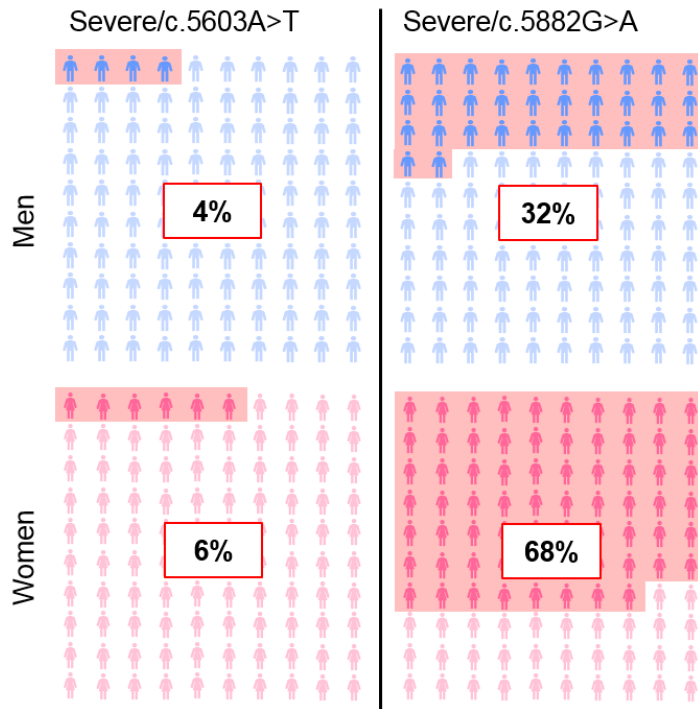

In a hypothetical population with the genotype 'severe allele and c.5603A>T' in which 10/200 (~5%) individuals have Stargardt disease (STGD1),<sup>12,13</sup> with a STGD1 female:male ratio of 63:37 (Table 1), ~6/100 (~6%) women and ~4/100 (~4%) men would be affected. In a population with the genotype 'severe allele and c.5882G>A', in which ~100/200 (~50%) individuals have STGD1 (Table 2), with a STGD1 female:male ratio of 68:32 (Table 1), ~68/100 (~68%) women and ~32/100 (~32%) men would be affected.

## eReferences

1. Cornelis SS, Bax NM, Zernant J, et al. In silico functional meta-analysis of 5,962 ABCA4 variants in 3,928 retinal dystrophy cases. *Hum Mutat.* 2017;38(4):400-408.
2. Sangermano R, Khan M, Cornelis SS, et al. ABCA4 midgenes reveal the full splice spectrum of all reported noncanonical splice site variants in Stargardt disease. *Genome Res.* 2018;28(1):100-110.
3. Bauwens M, Garanto A, Sangermano R, et al. ABCA4-associated disease as a model for missing heritability in autosomal recessive disorders: novel noncoding splice, cis-regulatory, structural, and recurrent hypomorphic variants. *Genet Med.* 2019;21(8):1761-1771.
4. Fadaie Z, Khan M, Del Pozo-Valero M, et al. Identification of splice defects due to noncanonical splice site or deep-intronic variants in ABCA4. *Hum Mutat.* 2019;40(12):2365-2376.
5. Khan M, Cornelis SS, Pozo-Valero MD, et al. Resolving the dark matter of ABCA4 for 1054 Stargardt disease probands through integrated genomics and transcriptomics. *Genet Med.* 2020.
6. Khan M, Cornelis SS, Khan MI, et al. Cost-effective molecular inversion probe-based ABCA4 sequencing reveals deep-intronic variants in Stargardt disease. *Hum Mutat.* 2019;40(10):1749-1759.
7. Braun TA, Mullins RF, Wagner AH, et al. Non-exonic and synonymous variants in ABCA4 are an important cause of Stargardt disease. *Hum Mol Genet.* 2013;22(25):5136-5145.
8. Zernant J, Xie YA, Ayuso C, et al. Analysis of the ABCA4 genomic locus in Stargardt disease. *Hum Mol Genet.* 2014;23(25):6797-6806.
9. Schulz HL, Grassmann F, Kellner U, et al. Mutation Spectrum of the ABCA4 Gene in 335 Stargardt Disease Patients From a Multicenter German Cohort-Impact of Selected Deep Intronic Variants and Common SNPs. *Invest Ophthalmol Vis Sci.* 2017;58(1):394-403.
10. Zernant J, Lee W, Nagasaki T, et al. Extremely hypomorphic and severe deep intronic variants in the ABCA4 locus result in varying Stargardt disease phenotypes. *Cold Spring Harb Mol Case Stud.* 2018;4(4).
11. Sangermano R, Garanto A, Khan M, et al. Deep-intronic ABCA4 variants explain missing heritability in Stargardt disease and allow correction of splice defects by antisense oligonucleotides. *Genet Med.* 2019.
12. Runhart EH, Sangermano R, Cornelis SS, et al. The common ABCA4 Variant p.Asn1868Ile shows nonpenetrance and variable expression of Stargardt disease when present in trans with severe variants. *Invest Ophthalmol Vis Sci.* 2018;59(8):3220-3231.
13. Cremers FPM, Cornelis SS, Runhart EH, Astuti GDN. Author Response: Penetrance of the ABCA4 p.Asn1868Ile allele in Stargardt disease. *Invest Ophthalmol Vis Sci.* 2018;59(13):5566-5568.
